# Supplementary material for: Environmentally responsive polymeric materials: effect of the topological structure on self-assembly
Source: Royal Society of Chemistry journal article supplement (doi:10.1039/c4sm01072h), 2014-06-24
Supplement: c4sm01072h1.pdf [file c4sm01072h1.pdf]

## **Electronic supplementary information**

### **Environmental responsive polymeric materials: effect of topological structure on self-assembly**

Hui Wang <sup>a</sup>, Pei Zhang <sup>a</sup>, Xuefeng Shi <sup>a</sup>, Danfeng Yu <sup>a</sup>, Jinben Wang<sup>\*, a</sup>, Haike Yan <sup>a</sup>,  
and Gang Ji <sup>b</sup>

*<sup>a</sup> Key Laboratory of Colloid and Interface Science, Beijing National Laboratory for  
Molecular Sciences (BNLMS), Institute of Chemistry, Chinese Academy of Sciences,  
Beijing 100190, P. R. China*

*<sup>b</sup> Center for Biological Electron Microscopy, Institute of Biophysics, Chinese  
Academy of Sciences, Beijing 100101, P. R. China*

\* To whom correspondence should be addressed. E-mail: [jbwang@iccas.ac.cn](mailto:jbwang@iccas.ac.cn).

Phone: 86-10-62523395. Fax: 86-10-62523395.

## Synthesis of homopolymers PAGC<sub>8</sub> and PASC<sub>8</sub>.

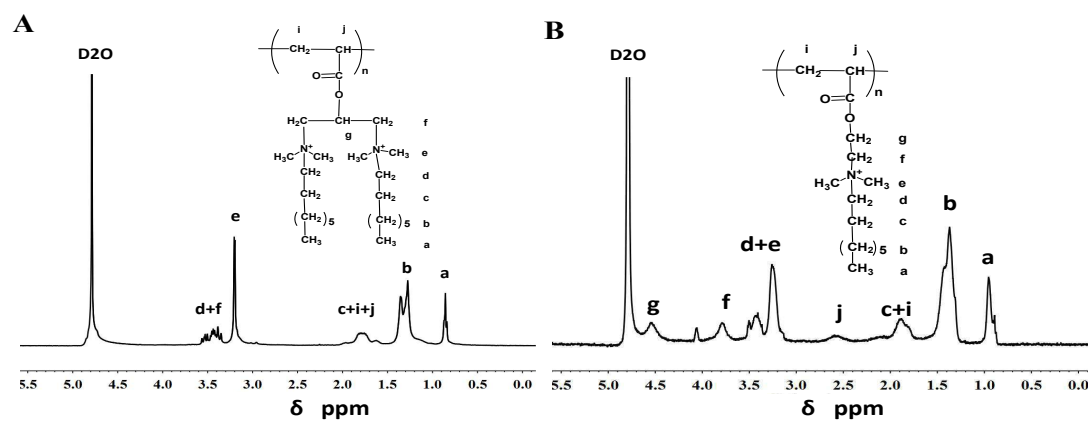

**Fig. S1** Typical <sup>1</sup>H NMR spectra of geminized homopolymer PAGC<sub>8</sub> (A) and traditional homopolymer PASC<sub>8</sub> (B) in D<sub>2</sub>O.

**Table S1** GPC analysis results of PAGC<sub>8</sub> and PASC<sub>8</sub>

| Homopolymer       | M <sub>n</sub> | M <sub>w</sub> | M <sub>z</sub> | M <sub>w</sub> /M <sub>n</sub> | M <sub>z</sub> /M <sub>w</sub> |
|-------------------|----------------|----------------|----------------|--------------------------------|--------------------------------|
| PAGC <sub>8</sub> | 9898           | 11332          | 13548          | 1.14                           | 1.20                           |
| PASC <sub>8</sub> | 9834           | 11057          | 12777          | 1.12                           | 1.16                           |

### Molecular interaction in the aggregation process.

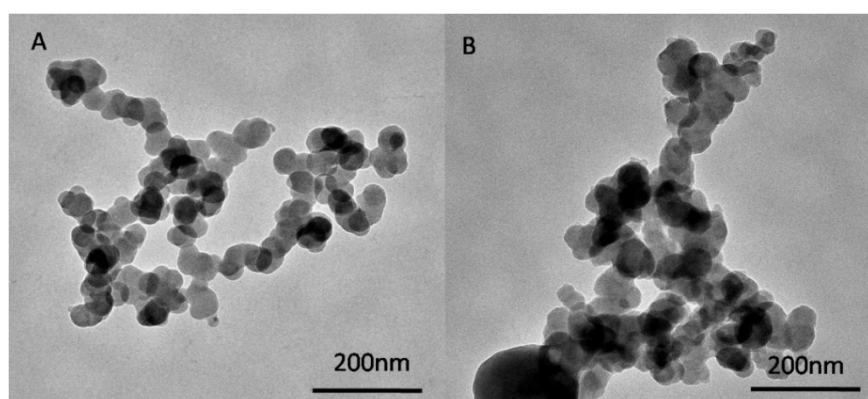

**Fig. S2** TEM images of AGC<sub>8</sub> at the concentrations of 1g/L (A) and 5g/L (B) in water.

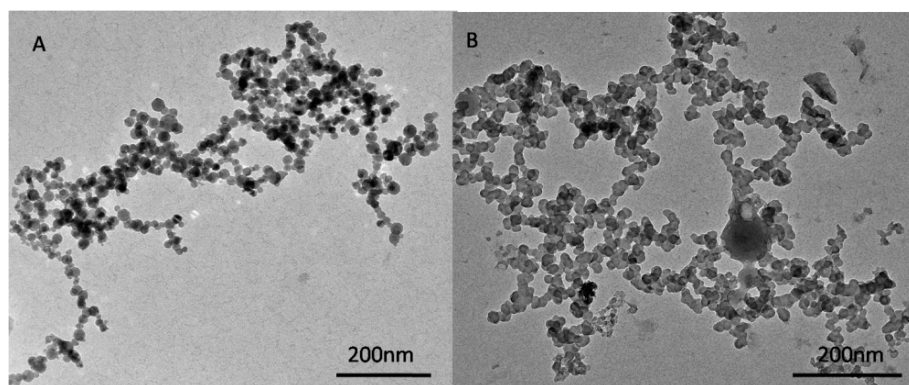

**Fig. S3** TEM images of AGC<sub>8</sub> at the concentrations of 1g/L (A) and 5g/L (B) in ethanol.
